# Supplementary material for: Single-atom catalysts integrated with semiconductors for constructing a dual-potential electrochemiluminescence sensor for intracellular H2O2 detection
Source: Royal Society of Chemistry journal article supplement (doi:10.1039/d5ta04004c), 2025-01-01
Supplement: d5ta04004c1.pdf [file d5ta04004c1.pdf]

## Supporting Information

### **Single-atom catalyst-integrated with semiconductors for constructing a dual-potential electrochemiluminescence sensor for intracellular $\text{H}_2\text{O}_2$ detection**

Yiran Ying,<sup>#,a</sup> Tianyou Chen,<sup>#,a</sup> Arzugul Ablimit,<sup>b</sup> Chan Zhang,<sup>b</sup> Bing Sun<sup>a</sup>, Jing  
Wu<sup>\*,a</sup> and Wu Liu<sup>\*,c</sup>

<sup>a</sup>School of Science, China University of Geosciences (Beijing), Beijing 100083,  
China

<sup>b</sup>Beijing Engineering and Technology Research Center of Food Additives and Beijing  
Advanced Innovation Center for Food Nutrition and Human Health, Beijing  
Technology and Business University, Beijing 100048, China

<sup>c</sup>School of Pharmaceutical Sciences, Cheeloo College of Medicine, Shandong  
University, Jinan 250012, China

\*Corresponding authors: Jing Wu (Email: wujing@cugb.edu.cn), Wu Liu (Email:  
wuliu@sdu.edu.cn)

## **Table of Contents**

1. Experimental Procedures
2. Supplementary Figures
3. Supplementary Table

## 1. Experimental Procedures

### 1.1 Reagents and chemicals

Melamine (99%), cobalt chloride hexahydrate ( $\text{CoCl}_2 \cdot 6\text{H}_2\text{O}$ , 99.99%), phosphate buffered saline (PBS), molybdenum sulfide ( $\text{MoS}_2$ , 99%), thiourea ( $\text{NH}_2\text{CSNH}_2$ , 99%), Nafion-117 (5wt.%), glutathione (GSH, 99%), L (+)-cysteine (Cys, 99%), dopamine hydrochloride (DA, 99%) and methyl alcohol (HPLC,  $\geq 99.9\%$ ) were purchased from innochem Co. Ltd (Beijing, China). Iron chloride hexahydrate ( $\text{FeCl}_3 \cdot 6\text{H}_2\text{O}$ , 98%) was purchased from Alfa Aesar (China) Chemical Co., Ltd (Beijing, China). Luminol, glucose (Glu, 99%), *L*-ascorbic acid (AA), uric acid (UA, 99%) and *p*-benzoquinone (BQ) were purchased from Aladdin biochemical technology (Shanghai, China). 5,5-dimethyl-1-pyrroline N-oxide (DMPO) was obtained from Tokyo Chemical Industry Co., Ltd (Shanghai, China). Hydrogen peroxide ( $\text{H}_2\text{O}_2$ , 30% aqueous solution), trypsin-EDTA, acetone and ethanol were brought from Sinopharm Chemical Reagent Co., Ltd (Beijing, China).

### 1.2 Apparatus

Scanning electron microscopy (SEM) was performed on a JSM-7900 scanning electron microscope (JEOL, Tokyo, Japan) with an accelerating voltage of 3 kV. High resolution transmission electron microscopy (HRTEM) was performed on a JEOL-1400 scanning electron microscope (JEOL, Tokyo, Japan). The aberration-corrected high-angle annular dark-field scanning transmission electron microscopy (AC-HAADF-STEM) was performed by a Titan G2 600 (FEI, United States). X-ray photoelectron spectra (XPS) were recorded on an X-ray photoelectron spectrometer with Al-K $\alpha$  X-ray ( $h\nu = 1486.6$  eV) radiation (ThermoFisherEscaLab Xi+, MA, USA). X-ray diffractometer (D8 advance, Bruker, Germany) with Cu K $\alpha$  radiation ( $\lambda = 1.5418$  Å) was used to investigate the crystal structures of the samples by collecting X-ray powder diffraction (XRD) spectra with a scan rate of  $0.05^\circ (2\theta) \text{ s}^{-1}$  in the  $2\theta$  range of  $5\text{--}80^\circ$ . Electronic paramagnetic resonance (EPR) spectra of  $\bullet\text{O}_2^-$  and  $\bullet\text{OH}$  radicals were measured by a Bruker E500 spectrometer under light irradiation. The X-ray absorption fine structure spectra (Co K-edge) were collected at BL14W1 station in Shanghai Synchrotron

Radiation Facility (SSRF). Attenuated-total-reflection Fourier transform infrared spectroscopy (ATR-FTIR) analysis was performed using a Nicolet iS50 FTIR spectrometer (Thermo). Cyclic voltammetry (CV) was measured on a CHI 760e electrochemical workstation (Chenghua Co., Ltd., Shanghai, China) by a three-electrode electrochemical cell system which was composed of a modified glass carbon electrode (GCE) (5 mm diameter) as the working electrode, an Ag/Ag<sup>+</sup> electrode as the reference electrode, and a Pt wire (1 mm diameter) as the counter electrode. ECL was performed with a homemade ECL analyzer which contained a CHI 760e electrochemical workstation and an ultraweak chemiluminescence (CL) analyzer (IFFM-E, Xi'an Remex Analytical Instrument Co., Ltd., China). The electrochemical workstation equipped with the above three-electrode system was utilized to apply the designed voltage. CL analyzer was utilized to take ECL curves.

### 1.3 X-ray absorption fine structure (XAFS) Measurements

Co K-edge XAFS analyses were performed with Si(111) crystal monochromators at the BL14W Beam line at the Shanghai Synchrotron Radiation Facility (SSRF) (Shanghai, China). Before the analysis at the beamline, samples were placed into aluminum sample holders and sealed using Kapton tape film. The XAFS spectra were recorded at room temperature using a 4-channel Silicon Drift Detector (SDD) Bruker 5040. Co K-edge extended X-ray absorption fine structure (EXAFS) spectra were recorded in transmission mode. Negligible changes in the line-shape and peak position of Co K-edge XANES spectra were observed between two scans taken for a specific sample. The XAFS spectra of these standard samples were recorded in transmission mode. The spectra were processed and analyzed by the software codes Athena.

### 1.4 Density functional theory (DFT) method

All the DFT calculations were conducted based on the Vienna Ab-initio Simulation Package (VASP). The exchange-correlation effects were described by the Perdew-Burke-Ernzerhof (PBE) functional within the generalized gradient approximation (GGA) method. The core-valence interactions were accounted by the projected augmented wave (PAW) method. The energy cutoff for plane wave expansions was set to 400 eV, and the 2×2×1 Monkhorst-Pack grid k-points were selected to sample the

Brillouin zone integration. The structural optimization was completed for energy and force convergence set at  $1.0 \times 10^{-4}$  eV and  $0.05$  eV  $\text{\AA}^{-1}$ , respectively.

The Gibbs free energy change ( $\Delta G$ ) of each step is calculated using the following formula:

$$\Delta G = \Delta E + \Delta \text{ZPE} - T\Delta S$$

where  $\Delta E$  is the electronic energy difference directly obtained from DFT calculations,  $\Delta \text{ZPE}$  is the zero point energy difference,  $T$  is the room temperature (298.15 K) and  $\Delta S$  is the entropy change. ZPE could be obtained after frequency calculation [1]:

$$\text{ZPE} = \frac{1}{2} \sum h\nu_i$$

And the TS values of adsorbed species are calculated according to the vibrational frequencies [2]:

$$TS = k_B T \left[ \sum_k \ln \left( \frac{1}{1 - e^{-h\nu_i/k_B T}} \right) + \sum_k \frac{h\nu_i}{k_B T} \frac{1}{(e^{h\nu_i/k_B T} - 1)} + 1 \right]$$

## 2. Supplementary Figures

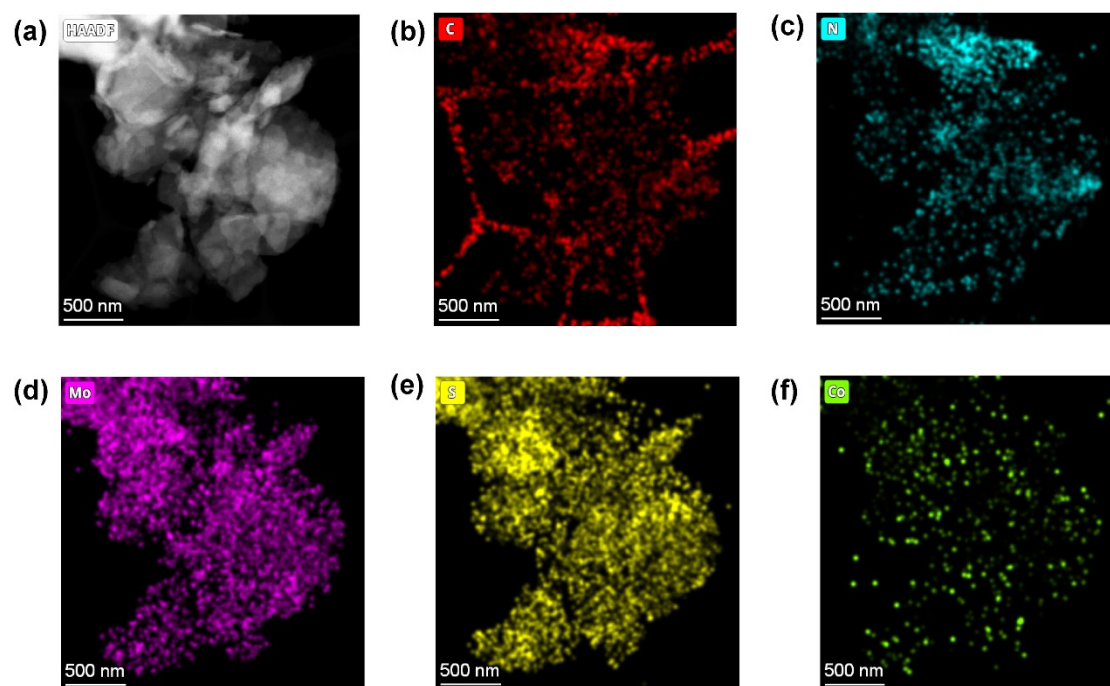

**Figure S1.** (a) Aberration-corrected high-angle annular dark field scanning transmission electron microscopy (AC-HAADF-STEM) image of MoS<sub>2</sub>/Co-C<sub>3</sub>N<sub>4</sub> and elemental mapping images: C (b), N (c), Mo (d), S (e), and Co (f).

To analyze the crystalline phase of the prepared catalyst, X-ray diffraction (XRD) measurements were performed. As expected, no new characteristic peaks were observed, except for the 13.0° and 27.4° diffraction peaks attributed to the (100) and (002) crystal faces of g-C<sub>3</sub>N<sub>4</sub> (Figure S2a), further confirming that the metal atoms did not agglomerate. The XRD patterns of MoS<sub>2</sub>/Co-C<sub>3</sub>N<sub>4</sub>, MoS<sub>2</sub>/Fe-C<sub>3</sub>N<sub>4</sub>, MoS<sub>2</sub> and g-C<sub>3</sub>N<sub>4</sub> were shown (Figure S2b). The characteristic peaks of the (100) and (002) crystal faces of g-C<sub>3</sub>N<sub>4</sub> and the characteristic peaks of the (002), (100), (103), and (110) crystal faces of MoS<sub>2</sub> were observed in the composite materials. Additionally, no new peaks were formed, indicating the successful combination of MoS<sub>2</sub> and g-C<sub>3</sub>N<sub>4</sub>.

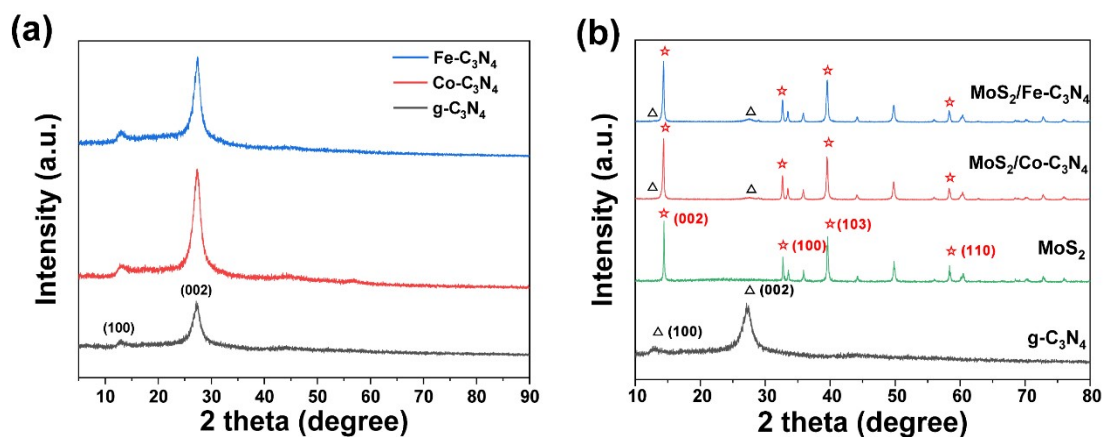

**Figure S2.** (a) XRD patterns of Co-C<sub>3</sub>N<sub>4</sub>, Fe-C<sub>3</sub>N<sub>4</sub>, and g-C<sub>3</sub>N<sub>4</sub>. (b) XRD patterns of MoS<sub>2</sub>/Fe-C<sub>3</sub>N<sub>4</sub>, MoS<sub>2</sub>/Co-C<sub>3</sub>N<sub>4</sub>, MoS<sub>2</sub>, and g-C<sub>3</sub>N<sub>4</sub>.

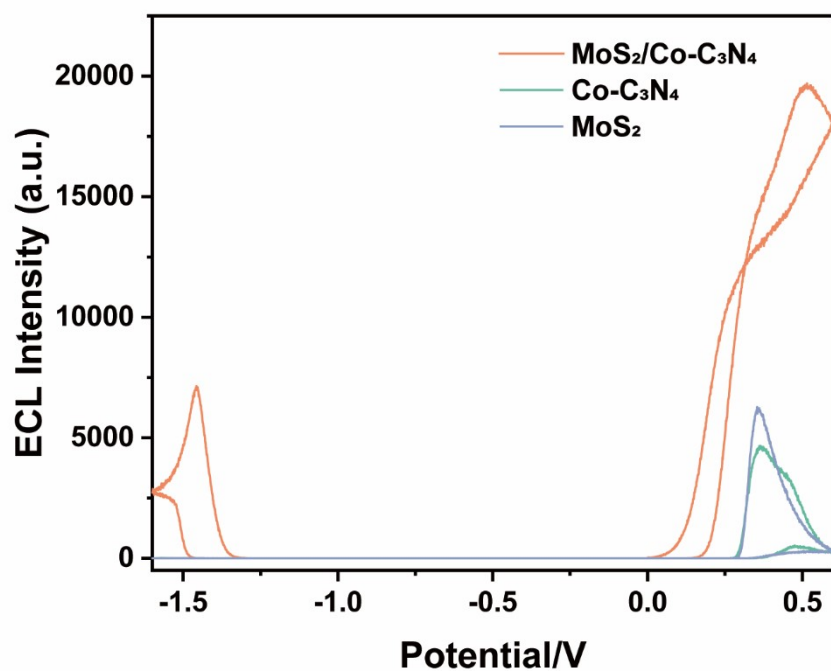

**Figure S3.** ECL intensity of MoS<sub>2</sub>/Co-C<sub>3</sub>N<sub>4</sub>-modified, MoS<sub>2</sub>-modified, and Co-C<sub>3</sub>N<sub>4</sub>-modified GCE in the luminol-H<sub>2</sub>O<sub>2</sub> system (PMT voltage = 900 V, CV parameters: potential range from – 1.6 V to 0.6 V, scan rate of 50 mV s<sup>-1</sup>).



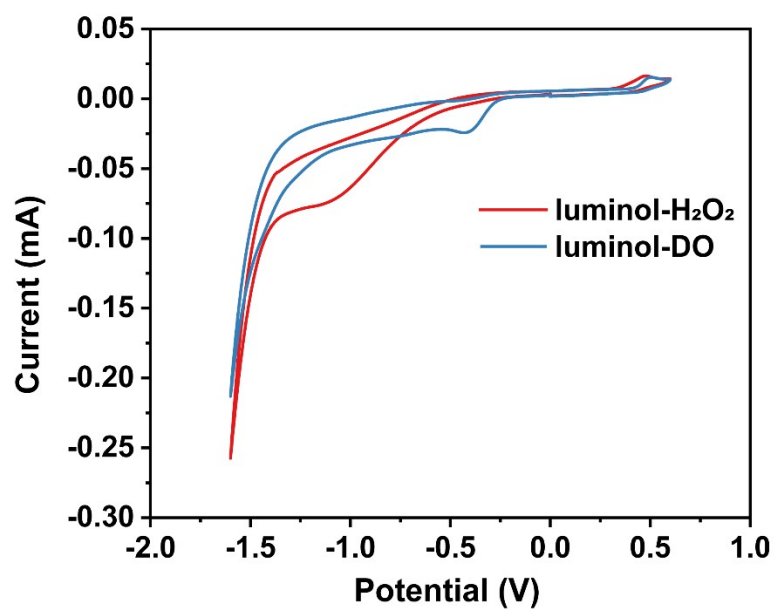

**Figure S4.** Comparative CV curves of MoS<sub>2</sub>/Co-C<sub>3</sub>N<sub>4</sub> in the luminol-H<sub>2</sub>O<sub>2</sub> system and the luminol-DO system.

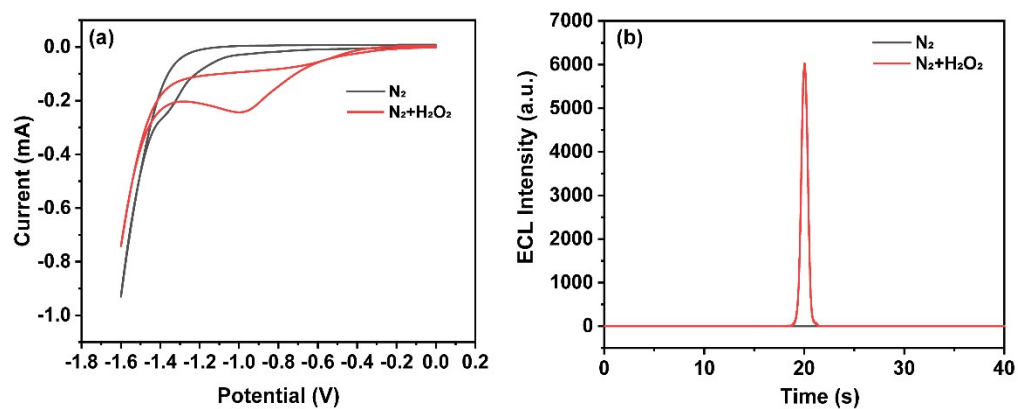

**Figure S5.** CV curves (a) and ECL intensity (b) of MoS<sub>2</sub>/Co-C<sub>3</sub>N<sub>4</sub>-luminol system in N<sub>2</sub>-saturated PBS buffer solution with or without H<sub>2</sub>O<sub>2</sub>.

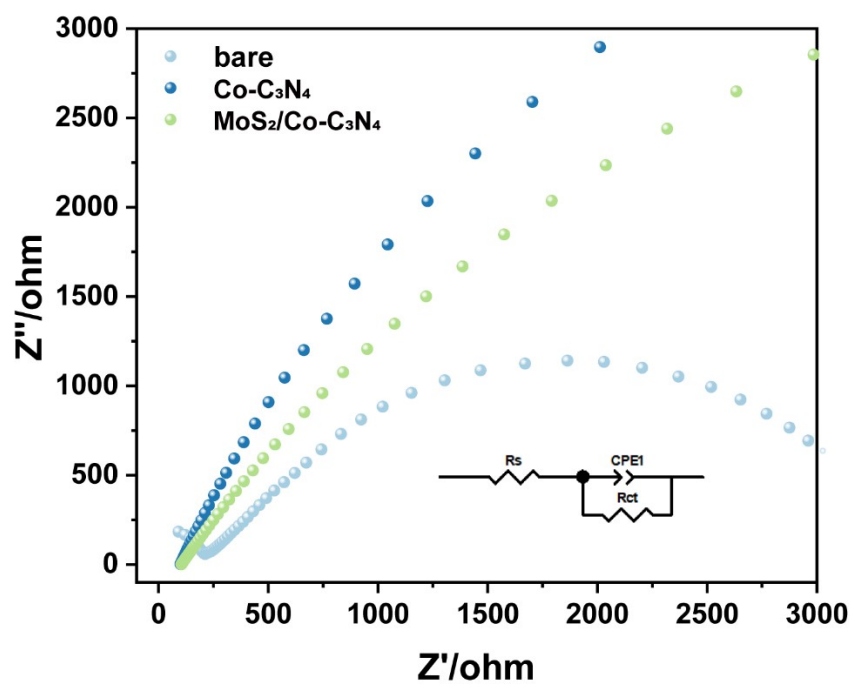

**Figure S6.** Electrochemical impedance spectra (EIS) of the bare electrode, Co-C<sub>3</sub>N<sub>4</sub>, and MoS<sub>2</sub>/Co-C<sub>3</sub>N<sub>4</sub> recorded in 5 mM Fe[(CN)<sub>6</sub>]<sup>3-/4-</sup> solution. Inset: Corresponding equivalent circuit used for fitting.  $R_s$ : solution resistance;  $R_{ct}$ : charge transfer resistance; CPE: constant phase element.

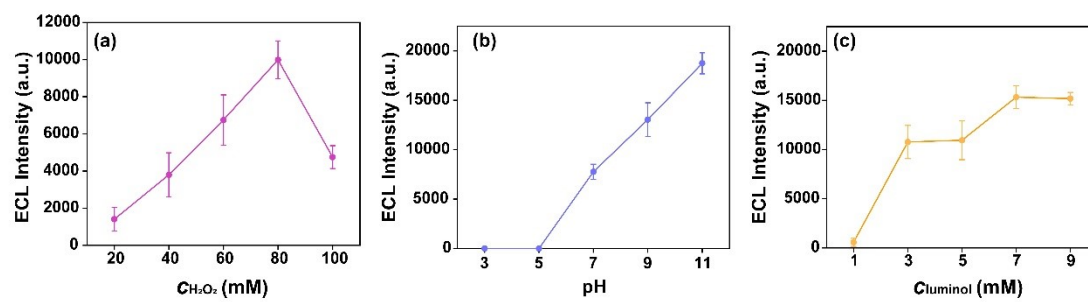

**Figure S7.** Optimization of reagent concentrations for  $\text{MoS}_2/\text{Co-C}_3\text{N}_4\text{-luminol-H}_2\text{O}_2$  ECL system:

(a)  $\text{H}_2\text{O}_2$  concentration, (b) pH value, and (c) luminol concentration.

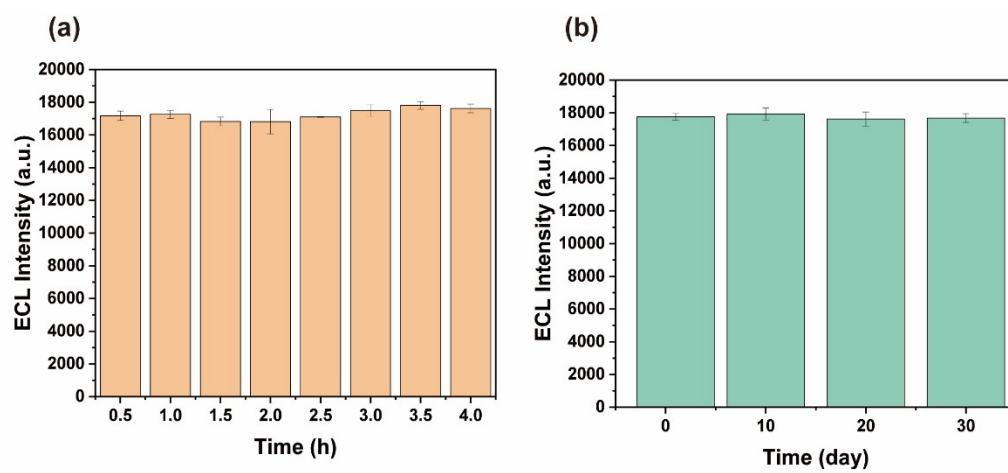

**Figure S8.** Intraday (a) and interday (b) data of anodic ECL intensity of MoS<sub>2</sub>/Co-C<sub>3</sub>N<sub>4</sub> under optimal conditions.

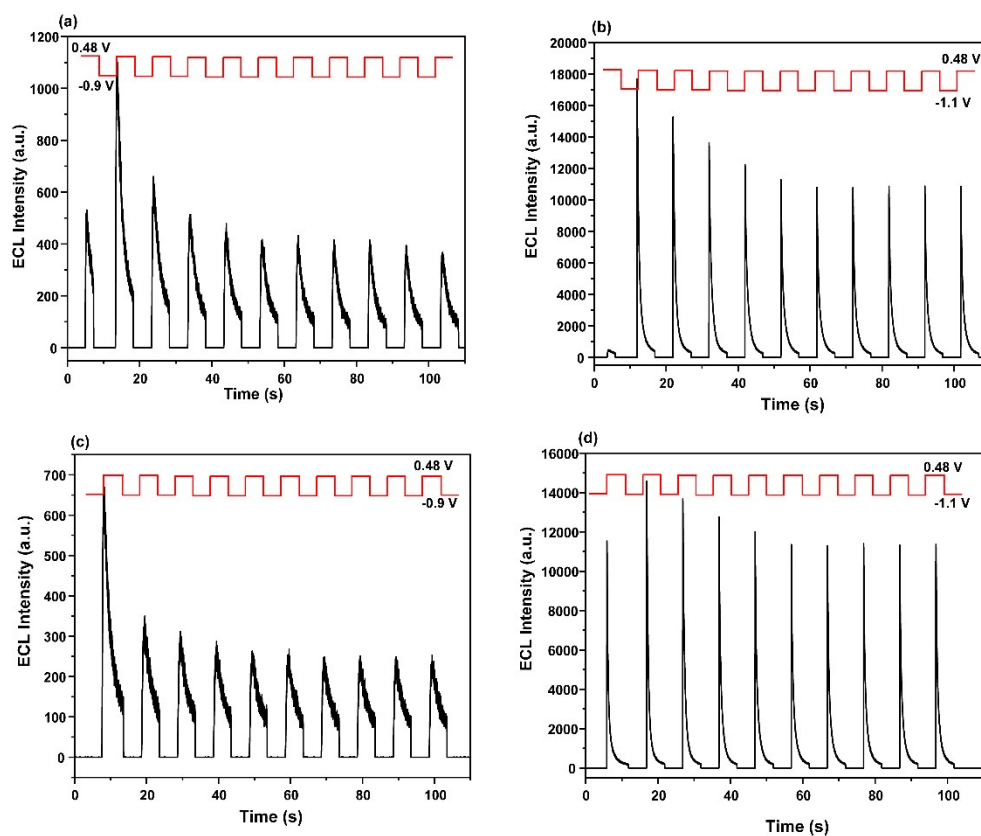

**Figure S9.** Transient ECL of MoS<sub>2</sub>/Co-C<sub>3</sub>N<sub>4</sub>-luminol-H<sub>2</sub>O<sub>2</sub> system under stepwise pulse (SP) conditions within the potential ranges of 0.48 ~ -0.9 V (a), 0.48 ~ -1.1 V (b), -0.9 ~ 0.48 V (c), and -1.1 ~ 0.48 V (d). The red curves represent the applied potential steps.

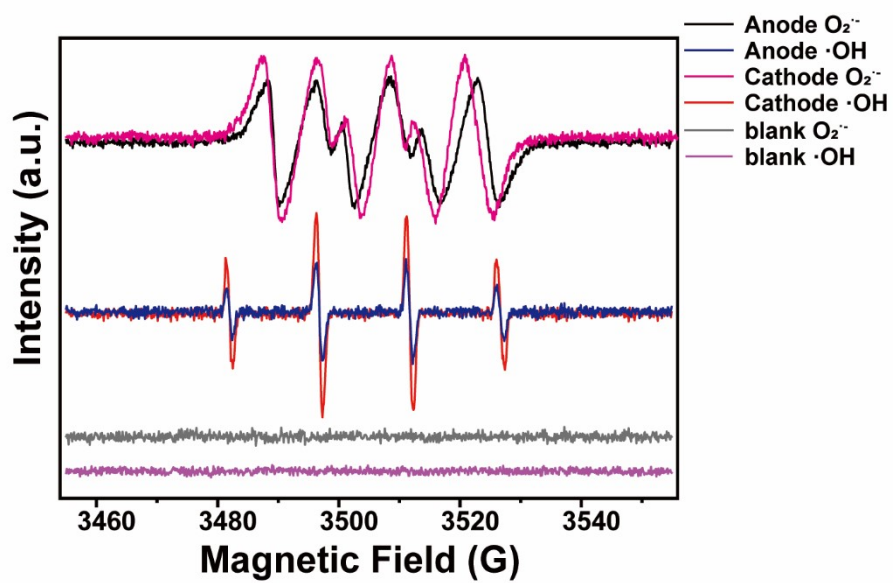

**Figure S10.** EPR spectra of  $MoS_2/Co-C_3N_4$  and control in  $H_2O_2$ .

### 3. Supplementary Table

**Table S1.** Local structure parameters around Co estimated by EXAFS analysis of MoS<sub>2</sub>/Co-C<sub>3</sub>N<sub>4</sub>.

| Shell | N <sup>a</sup> | <i>R</i> (Å) <sup>b</sup> | σ <sup>2</sup> (Å <sup>2</sup> ) <sup>c</sup> | Δ <i>E</i> <sub>0</sub> (eV) <sup>d</sup> | R factor |
|-------|----------------|---------------------------|-----------------------------------------------|-------------------------------------------|----------|
| Co-N  | 2.3 (2)        | 1.9                       | 0.014                                         | -9.8                                      | 0.026    |
| Co-S  | 0.7 (1)        | 2.2                       | 0.002                                         |                                           |          |

<sup>a</sup>N = coordination number; <sup>b</sup>*R* = distance between absorber and backscatter atoms; <sup>c</sup>σ<sup>2</sup> = Debye-Waller factor; <sup>d</sup>Δ*E*<sub>0</sub> = energy shift; R-space fit.



**Table S2.** Intra-day ECL intensity measurements of MoS<sub>2</sub>/Co-C<sub>3</sub>N<sub>4</sub>.

| Time<br>(h) | Measurement<br>1 | Measurement<br>2 | Measurement<br>3 | Mean     | Relative Standard<br>Deviation (RSD) |
|-------------|------------------|------------------|------------------|----------|--------------------------------------|
| 0.5         | 17038            | 16988            | 17512            | 17179.33 | 1.61%                                |
| 1.0         | 17529            | 17032            | 17223            | 17261.33 | 1.50%                                |
| 1.5         | 16778            | 16587            | 17121            | 16828.67 | 1.64%                                |
| 2.0         | 16216            | 16581            | 17652            | 16816.33 | 4.39%                                |
| 2.5         | 17073            | 17111            | 17125            | 17103.00 | 0.61%                                |
| 3.0         | 17332            | 17256            | 17895            | 17494.33 | 1.98%                                |
| 3.5         | 18021            | 17850            | 17556            | 17809.00 | 1.34%                                |
| 4.0         | 17317            | 17802            | 17752            | 17623.67 | 1.43%                                |

Paired *t*-tests were performed between adjacent time points. The critical *t*-value at *df* = 2,  $\alpha$  = 0.05 (two-tailed) is  $\pm 4.303$ . Results are as follows:

**Table S3.** Paired *t*-test results for intra-day ECL intensity of MoS<sub>2</sub>/Co-C<sub>3</sub>N<sub>4</sub>.

| Comparison     | Mean<br>Difference (D) | SD of Difference<br>(SD) | t-value | p-value | Significance ( $\alpha$ =<br>0.05) |
|----------------|------------------------|--------------------------|---------|---------|------------------------------------|
| 0.5 h vs 1.0 h | 82.00                  | 390.98                   | 0.36    | 0.748   | Not significant                    |
| 1.0 h vs 1.5 h | -432.66                | 367.21                   | -2.04   | 0.178   | Not significant                    |
| 1.5 h vs 2.0 h | -12.34                 | 738.47                   | -0.03   | 0.980   | Not significant                    |
| 2.0 h vs 2.5 h | 286.67                 | 738.47                   | 0.67    | 0.564   | Not significant                    |
| 2.5 h vs 3.0 h | 391.33                 | 345.56                   | 1.96    | 0.186   | Not significant                    |
| 3.0 h vs 3.5 h | 314.67                 | 238.25                   | 2.29    | 0.148   | Not significant                    |
| 3.5 h vs 4.0 h | -185.33                | 252.19                   | -2.27   | 0.150   | Not significant                    |

**Table S4.** Inter-day ECL intensity measurements of MoS<sub>2</sub>/Co-C<sub>3</sub>N<sub>4</sub>.

| Day | Replicate 1 | Replicate 2 | Replicate 3 | Mean     | Standard Deviation (SD) |
|-----|-------------|-------------|-------------|----------|-------------------------|
| 1   | 17886       | 17514       | 17850       | 17750.00 | 200.92                  |
| 10  | 18271       | 17555       | 17952       | 17926.00 | 366.68                  |
| 20  | 17175       | 17653       | 18031       | 17619.67 | 430.10                  |
| 30  | 17371       | 17811       | 17852       | 17678.00 | 248.07                  |

Paired t-tests were applied to adjacent day-pairs. The results are as follows:

**Table S5.** Paired *t*-test results for inter-day ECL intensity of MoS<sub>2</sub>/Co-C<sub>3</sub>N<sub>4</sub>.

| Comparison       | Mean Difference<br>(D) | SD of<br>Difference<br>(SD) | t-value | p-value | Significance<br>( $\alpha = 0.05$ ) |
|------------------|------------------------|-----------------------------|---------|---------|-------------------------------------|
| Day 1 vs Day 10  | 176.00                 | 366.68                      | 0.83    | 0.488   | Not significant                     |
| Day 10 vs Day 20 | -306.33                | 430.10                      | -1.23   | 0.321   | Not significant                     |
| Day 20 vs Day 30 | 58.33                  | 248.07                      | 0.41    | 0.715   | Not significant                     |

**Table S6.** Recovery results and t-test analysis for MoS<sub>2</sub>/Co-C<sub>3</sub>N<sub>4</sub> toward spiked H<sub>2</sub>O<sub>2</sub> concentrations (1, 10, and 100 nM).

| Spiked<br>Concentration (nM) | %Recovery<br>(Mean) | %RSD  | t-value | p-value | Significance ( $\alpha =$<br>0.05) |
|------------------------------|---------------------|-------|---------|---------|------------------------------------|
| 1                            | 94.0%               | 4.87% | -2.27   | 0.15    | Not significant                    |
| 10                           | 105.1%              | 9.85% | 0.77    | 0.51    | Not significant                    |
| 100                          | 97.13%              | 5.05% | -1.01   | 0.42    | Not significant                    |

The critical t-value at  $\alpha = 0.05$  (two-tailed) is  $\pm 4.303$ .

## References

- [1] J.K. Nørskov, J. Rossmeisl, A. Logadottir, L. Lindqvist, J.R. Kitchin, T. Bligaard, H. Jónsson, Origin of the overpotential for oxygen reduction at a fuel-cell cathode, J. Phys. Chem. B 108 (2004) 17886-17892
- [2] L.I. Bendavid, E.A. Carter, CO<sub>2</sub> adsorption on Cu<sub>2</sub>O(111): A DFT+U and DFT-D study, J. Phys. Chem. C 117 (2013) 26048-26059.
